# Supplementary material
Source: MDPI journal article supplement (https://www.mdpi.com/2076-3417/10/1/407)
Supplement: s1 [file s1]

**Supplementary Table S1.** Post hoc test results of repeated ANOVA of 2 (group: experimental group and control group)  $\times$  2 (test time: pre-test and post-test) for six indexes of the physical fitness.

|                                     |           | $Df_1$ | $Df_2$ | $F$    | $\eta_p^2$ |
|-------------------------------------|-----------|--------|--------|--------|------------|
| <b>10-meter shutter run</b>         | Pre-test  | 1      | 18     | 5.10*  | 0.22       |
|                                     | Post-test | 1      | 18     | 9.63** | 0.35       |
| <b>Standing broad jump</b>          | Pre-test  | 1      | 18     | 4.04   |            |
|                                     | Post-test | 1      | 18     | 2.39   |            |
| <b>Throw a tennis ball</b>          | Pre-test  | 1      | 18     | 7.86*  | 0.30       |
|                                     | Post-test | 1      | 18     | 2.75   |            |
| <b>Both legs jump in succession</b> | Pre-test  | 1      | 18     | 1.72   |            |
|                                     | Post-test | 1      | 18     | 4.75*  | 0.21       |
| <b>Balance beam</b>                 | Pre-test  | 1      | 18     | 3.32   |            |
|                                     | Post-test | 1      | 18     | 1.55   |            |
| <b>Sit and reach</b>                | Pre-test  | 1      | 18     | 0.57   |            |
|                                     | Post-test | 1      | 18     | 0.21   |            |

Note. \* $p < 0.05$ . \*\* $p < 0.01$ . \*\*\* $p < 0.001$ .
